# Supplementary material for: Optimization of a Lambda-RED Recombination Method for Rapid Gene Deletion in Human Cytomegalovirus
Source: MDPI journal article supplement (doi:10.3390/ijms221910558), 2021-09-29

## Supplementary Material

**Table S1.** Predicted size (bp) of the PCR products using the different oligonucleotides combination for both WT and mutant template genome for all the assayed genes.

| Gene         | WT ab <sup>1</sup> | Mutant ab <sup>1</sup> | Mutant ac <sup>2</sup> | Mutant db <sup>3</sup> |
|--------------|--------------------|------------------------|------------------------|------------------------|
| <b>UL2</b>   | 520                | 1961                   | 1067                   | 1285                   |
| <b>UL5</b>   | 928                | 2151                   | 1079                   | 1363                   |
| <b>UL6</b>   | 1342               | 2211                   | 1226                   | 1276                   |
| <b>UL7</b>   | 1114               | 2169                   | 1141                   | 1319                   |
| <b>UL8</b>   | 831                | 2186                   | 1206                   | 1291                   |
| <b>UL9</b>   | 1157               | 2194                   | 1179                   | 1306                   |
| <b>UL44</b>  | 1903               | 2325                   | 1454                   | 1162                   |
| <b>UL121</b> | 893                | 2125                   | 1179                   | 1237                   |
| <b>US7</b>   | 1030               | 2081                   | 1070                   | 1302                   |
| <b>US9</b>   | 1192               | 2172                   | 1050                   | 1413                   |
| <b>US13</b>  | 1150               | 2668                   | 1130                   | 1249                   |
| <b>US14</b>  | 1387               | 2178                   | 1119                   | 1350                   |
| <b>US16</b>  | 1549               | 2343                   | 1425                   | 1209                   |
| <b>US17</b>  | 1410               | 2252                   | 1239                   | 1304                   |
| <b>US18</b>  | 1362               | 2261                   | 1208                   | 1344                   |
| <b>US20</b>  | 1319               | 2278                   | 1189                   | 1380                   |
| <b>US21</b>  | 1242               | 2246                   | 1270                   | 1267                   |
| <b>US30</b>  | 1974               | 2648                   | 1310                   | 1629                   |
| <b>pp65</b>  | 1905               | 1949                   | 1044                   | 1196                   |
| <b>IE1</b>   | 2132               | 2096                   | 1018                   | 1369                   |
| <b>gO</b>    | 1796               | 2119                   | 1131                   | 1279                   |
| <b>gM</b>    | 1410               | 2015                   | 1126                   | 1180                   |

<sup>1</sup> Amplification using the primers upstream and downstream (ab) of the target gene using the wild-type BAC DNA (WT) as a template.

<sup>2</sup> Amplification using the primer upstream of the deleted gene and an internal Kan primer (ac).

<sup>3</sup> Amplification using the internal Kan primer and a primer downstream of the deleted gene (db).

**Figure S1. Representative step-by-step process to validate UL6 deletion mutant.**

(A) DNA of the WT BAC and the BAC obtained from 8 colonies were digested with *Eco*RI and *Bam*HI enzymes and the restriction patterns obtained are shown. Digestion products were separated by electrophoresis on a 1% agarose gel. Lane 1: wild-type BAC DNA (WT). Lane 2-9: BAC DNA obtained from the 8 tested colonies for  $\Delta$ UL6. (B) To test the insertion of the Kan cassette in the UL6 ORF, the BACs obtained from the 8 tested colonies were used for PCR amplification using the upstream and downstream (ab) primers. Only clones 3 and 4 (highlighted in green) were positive for the insertion, while the band obtained from the other 6 clones had the size expected for WT. (C) A second PCR amplification was performed using clones 3 and 4 using the internal Kan primer and a primer downstream or upstream of the deleted gene (db or ac, respectively). PCR products were sequenced. For all the experiments 1 kb DNA molecular weight marker was used as a ladder.

**A** *Eco*RI/*Bam*HI digestion of the obtained colonies and the WT BAC

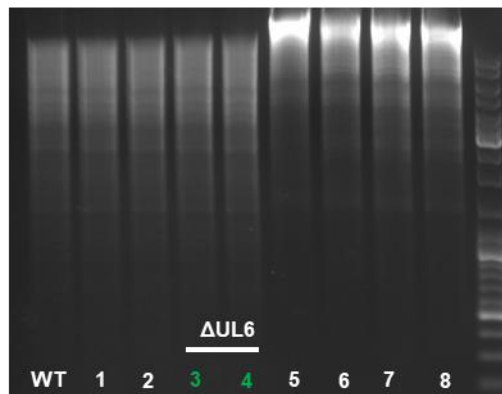

**B** PCR validation with external oligonucleotides

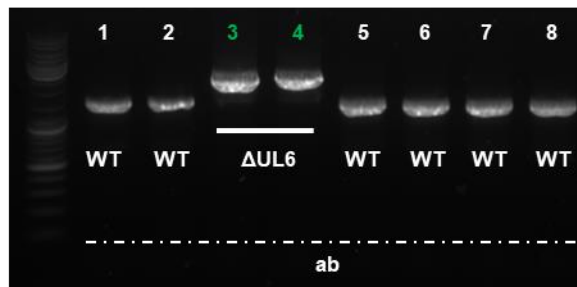

**C** PCR validation of the positive colonies from the above test

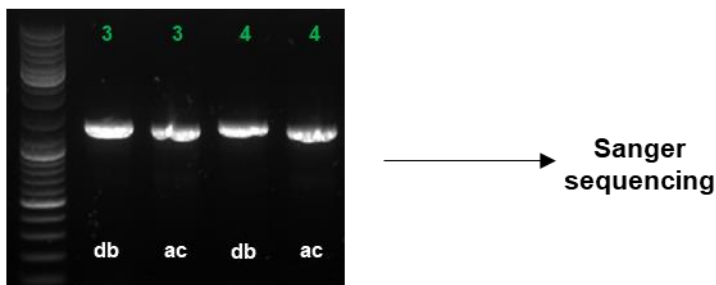

**Figure S2.** Representative images of PCR amplification products obtained to confirm the gene deletion of the indicated ORF. PCR products were separated by electrophoresis on a 1.5% agarose gel. Lane 1: 1 kb DNA molecular weight marker used as a ladder. Lane 2 and 3: PCR amplification products obtained using the primers upstream and downstream (ab) of the target gene using as a template either the wild-type BAC DNA (WT) or the indicated deletion mutant BAC DNA. Lane 4: PCR amplification product obtained using the internal Kan primer and a primer downstream of the deleted gene (db). Lane 5: PCR amplification product obtained using the primer upstream of the deleted gene and an internal Kan primer (ac).

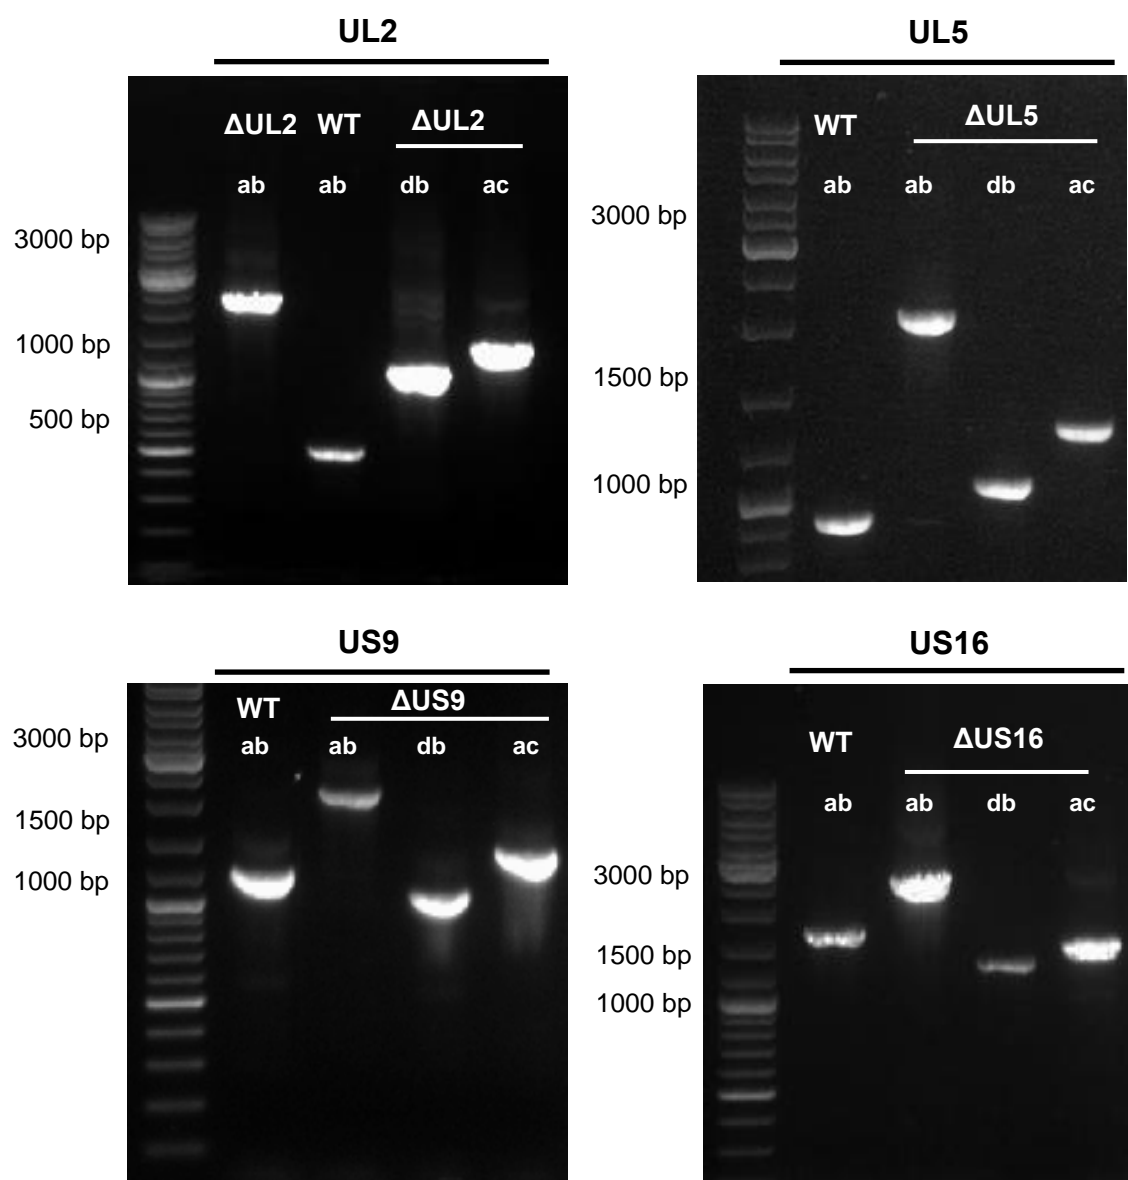

Supplement: s1 [file s1]
